# Supplementary material for: A Comparative Study of the Resilience of Urban and Rural Areas under Climate Change
Source: MDPI journal article supplement (doi:10.3390/ijerph19158911), 2022-07-22
Supplement: s1 [file s1]

# Supplemental File

**Supplemental Table S1.** The calculation method and data source of the indicator.

| Orientation     | Indicator                         | Calculation                                                                            | Source                                                                                          | Data type         |
|-----------------|-----------------------------------|----------------------------------------------------------------------------------------|-------------------------------------------------------------------------------------------------|-------------------|
| Social          | Aging index                       | Population over 65 years old/population 0-14 years old                                 | Social and economic information service platform of the census and statistics department (2019) | Statistical data  |
|                 | Education level                   | Population with high school (inclusive) and above/total population                     |                                                                                                 | Statistical data  |
|                 | Household size                    | Average household population                                                           |                                                                                                 | Statistical data  |
|                 | Dependency ratio                  | Population aged 0-14 and over 65/population aged 15-64                                 |                                                                                                 | Statistical data  |
|                 | Population density                | Population/area                                                                        |                                                                                                 | Statistical data  |
|                 | Disabled population               | Disabled population/total population                                                   |                                                                                                 | Statistical data  |
| Economic        | Agricultural land area            | Agricultural land area/total area                                                      | Land use survey of the center for land surveying and mapping (2016)                             | Graphic data      |
|                 | Number of agricultural households | Number of agricultural households/total number of industrial and commercial households | Social and economic information service platform of the census and statistics department (2019) | Statistical data  |
|                 | Residence income                  | Total local income/total population                                                    | Comprehensive income tax return (2018)                                                          | Statistical data  |
|                 | Low-income households             | Number of low-income households/total population                                       | Social and economic information service platform of the census and statistics department (2019) | Statistical data  |
| Infrastructure  | Medical facilities                | Emergency medical and first-aid hospital covered area/total area after buffer 5 km     | Emergency medical responsibility hospital in chiayi region (2019)                               | Point information |
|                 | School                            | Covered area/total area after 800 m of cultural and educational facilities buffer      | Directory of schools at all levels of the census and statistics department (2019)               | Point information |
|                 | Fire station                      | Covered area/total area of fire station buffer after 2700 m                            | Chiayi county fire station (2019)                                                               | Point information |
|                 | Road density                      | Road land area/total area                                                              | Land use survey of the center for land surveying and mapping (2016)                             | Graphic data      |
| Environment     | Impervious area                   | Building land/total area                                                               | Disaster potential map of disaster prevention and rescue technology center (2019)               | Graphic data      |
|                 | Green infrastructure              | Park and wetland area/total area                                                       |                                                                                                 | Graphic data      |
|                 | Green area                        | Farmland and forest area/total area                                                    |                                                                                                 | Graphic data      |
| Disaster threat | Earth-rock flow potential         | Potential area of earth-rock flow/total area                                           | Land use survey of the center for land surveying and mapping (2016)                             | Graphic data      |

|                       |                                             |                                                               |                                                                                      |                  |
|-----------------------|---------------------------------------------|---------------------------------------------------------------|--------------------------------------------------------------------------------------|------------------|
|                       | Stratum subsidence                          | Severe stratum subsidence area/total area                     |                                                                                      | Graphic data     |
|                       | Landslides                                  | Landslide and ground slip area/total area                     |                                                                                      | Graphic data     |
| Traditional knowledge | Percentage of indigenous population         | Indigenous population/total population                        | Social and economic information service platform of the statistics department (2019) | Statistical data |
|                       | Proportion of aboriginal elderly population | Indigenous population over 65 years old/indigenous population |                                                                                      | Statistical data |
